# Supplementary material
Source: MDPI journal article supplement (https://www.mdpi.com/2306-5710/8/1/6)
Supplement: s1 [file s1]

## Supplementary Materials

**Table S1.** Organic acids & furans standards: amounts used in grams (gr) and concentrations in (mg/ml) of each individual standard.

| <b>Formic Acid (FA)</b>            | <b>m FA (gr)</b>     | <b>m H<sub>2</sub>O (gr)</b> | <b>C FA (mg/ml)</b>     |
|------------------------------------|----------------------|------------------------------|-------------------------|
| Dilution 1                         | 2.7472               | 44.5413                      | 58.7095                 |
| Dilution 2                         | 4.0003               | 44.0137                      | 84.5861                 |
| Dilution 3                         | 5.0056               | 43.0422                      | 106.1742                |
| <b>Acetic Acid (Ac.Ac.)</b>        | <b>m Ac.Ac. (gr)</b> | <b>m H<sub>2</sub>O (gr)</b> | <b>C Ac.Ac. (mg/ml)</b> |
| Dilution 1                         | 2.5243               | 44.5782                      | 53.7261                 |
| Dilution 2                         | 4.0202               | 44.0559                      | 83.9495                 |
| Dilution 3                         | 5.0053               | 42.0235                      | 106.9622                |
| <b>Citric Acid (Cit.)</b>          | <b>m Cit. (gr)</b>   | <b>m H<sub>2</sub>O (gr)</b> | <b>C Cit. (mg/ml)</b>   |
| Dilution 1                         | 2.3720               | 44.1124                      | 53.7717                 |
| Dilution 2                         | 3.5152               | 44.0480                      | 79.8038                 |
| Dilution 3                         | 4.7198               | 44.5039                      | 106.0536                |
| <b>Levulinic Acid (LA)</b>         | <b>m LA (gr)</b>     | <b>m H<sub>2</sub>O (gr)</b> | <b>C LA (mg/ml)</b>     |
| Dilution 1                         | 2.3766               | 44.1031                      | 53.8873                 |
| Dilution 2                         | 3.5262               | 44.0462                      | 80.0568                 |
| Dilution 3                         | 4.7091               | 44.5782                      | 105.6368                |
| <b>Hydroxymethylfurfural (HMF)</b> | <b>m HMF (gr)</b>    | <b>m H<sub>2</sub>O (gr)</b> | <b>C HMF (mg/ml)</b>    |
| Dilution 1                         | 0.0034               | 14.5460                      | 0.2337                  |
| Dilution 2                         | 0.0080               | 14.3089                      | 0.5591                  |
| Dilution 3                         | 0.0142               | 14.5085                      | 0.9787                  |
| <b>Gamma Valerolactone (GVL)</b>   | <b>m GVL (gr)</b>    | <b>m H<sub>2</sub>O (gr)</b> | <b>C GVL (mg/ml)</b>    |
| Dilution 1                         | 2.5098               | 44.0277                      | 54.0695                 |
| Dilution 2                         | 4.0190               | 44.1294                      | 83.8042                 |
| Dilution 3                         | 5.2267               | 44.0672                      | 106.5694                |
| <b>Furfural (Fur.)</b>             | <b>m Fur. (gr)</b>   | <b>m H<sub>2</sub>O (gr)</b> | <b>C Fur. (mg/ml)</b>   |
| Dilution 1                         | 0.9557               | 44.0497                      | 21.2976                 |
| Dilution 2                         | 1.6235               | 44.0706                      | 35.7047                 |
| Dilution 3                         | 2.4931               | 44.0130                      | 54.0073                 |
| <b>Diformylfuran (DFF)</b>         | <b>m DFF (gr)</b>    | <b>m H<sub>2</sub>O (gr)</b> | <b>C DFF (mg/ml)</b>    |
| Dilution 1                         | 0.0050               | 14.0270                      | 0.3564                  |
| Dilution 2                         | 0.0080               | 14.1720                      | 0.5644                  |
| Dilution 3                         | 0.0130               | 14.3750                      | 0.9043                  |

**Table S2.** Mix standard solutions of V=15 ml: amounts used in grams (gr) and concentrations (mg/ml) of each individual standard.

| <b>Mix Standard Solutions</b> | <b>Components</b> | <b>Masses (gr)</b> | <b>C (mg/ml)</b> |
|-------------------------------|-------------------|--------------------|------------------|
| STD1                          | FA                | 0.3048             | 1.1799           |
|                               | Cit.              | 0.3074             | 1.1019           |
|                               | LA                | 1.0146             | 3.6449           |
|                               | HMF               | 1.5017             | 0.0991           |
| STD2                          | FA                | 0.6111             | 2.3658           |
|                               | Cit.              | 0.6159             | 2.2078           |
|                               | LA                | 1.0323             | 3.7085           |

|      |        |        |        |
|------|--------|--------|--------|
| STD3 | HMF    | 3.0123 | 0.1987 |
|      | FA     | 0.8603 | 3.3305 |
|      | Cit.   | 0.8671 | 3.1083 |
|      | LA     | 1.0380 | 3.7290 |
|      | HMF    | 4.6098 | 0.3042 |
| STD4 | FA     | 0.1457 | 0.5640 |
|      | Ac.Ac. | 0.1507 | 0.5381 |
|      | LA     | 1.0187 | 3.6596 |
|      | HMF    | 0.8572 | 0.0565 |
| STD5 | FA     | 0.8679 | 3.3599 |
|      | Ac.Ac. | 0.8580 | 3.0639 |
|      | LA     | 1.0095 | 3.6266 |
|      | HMF    | 2.5014 | 0.1651 |
| STD6 | FA     | 1.7125 | 6.6297 |
|      | Ac.Ac. | 1.7042 | 6.0857 |
|      | LA     | 1.0117 | 3.6345 |
|      | HMF    | 3.5120 | 0.2317 |

**Table S3.** Recipe of commercial products samples with internal standard (LA) of V=15ml.

|       | m B.VIN (gr) | m LA (gr) | Vmix (ml) | C LA (mg/ml) | C B.VIN (mg/ml) |
|-------|--------------|-----------|-----------|--------------|-----------------|
| B.VIN | 0.325        | 1.0201    | 15        | 3.6647       | 0.0216          |
|       | m ACV (gr)   | m LA (gr) | Vmix (ml) | C LA (mg/ml) | C ACV (mg/ml)   |
| ACV   | 0.3226       | 1.0199    | 15        | 3.6639       | 0.0215          |
|       | m Pom (gr)   | m LA (gr) | Vmix (ml) | C LA (mg/ml) | C Pom (mg/ml)   |
| POM   | 0.3315       | 1.0154    | 15        | 3.6478       | 0.0221          |

**Table S4.** Linear calibration of individual standards: 3-pts concentrations run at 0.5ml/min mobile phase.

| Individual Standards        | Equation             | R <sup>2</sup> |
|-----------------------------|----------------------|----------------|
| Formic Acid (FA)            | y = 204.93x + 73.732 | 1.0000         |
| Acetic Acid (Ac.Ac.)        | y = 123.26x - 153.48 | 1.0000         |
| Citric Acid (Cit.)          | y = 203.31x + 2989.6 | 0.9993         |
| Levulinic Acid (LA)         | y = 62.721x + 103.13 | 1.0000         |
| Hydroxymethylfurfural (HMF) | y = 28021x - 577.24  | 0.9998         |
| Gamma Valerolactone (GVL)   | y = 75.847x - 451.04 | 0.9999         |
| Furfural (Fur.)             | y = 2358.3x + 473.06 | 0.9998         |
| Diformylfuran (DFF)         | y = 26035x + 1295.7  | 0.9979         |

**Table S5.** Linear calibration of standards in mix solutions: 3-pts concentrations run at 0.3ml/min mobile phase.

| Standard Solutions in mixes STD1, STD2, & STD3 | Equation             | R <sup>2</sup> |
|------------------------------------------------|----------------------|----------------|
| Formic Acid (FA)                               | y = 234.53x - 3.1603 | 0.9995         |
| Citric Acid (Cit.)                             | y = 690.72x + 54.291 | 0.9998         |
| Hydroxymethylfurfural (HMF)                    | y = 3783.3x - 15.679 | 1.0000         |
| Standard Solutions in mixes STD4, STD5, & STD6 | Equation             | R <sup>2</sup> |

|                             |                        |        |
|-----------------------------|------------------------|--------|
| Formic Acid (FA)            | $y = 313.03x - 8.4127$ | 1.0000 |
| Acetic Acid (Ac.Ac.)        | $y = 235.13x - 2.6383$ | 1.0000 |
| Hydroxymethylfurfural (HMF) | $y = 3669.2x + 6.5032$ | 1.0000 |

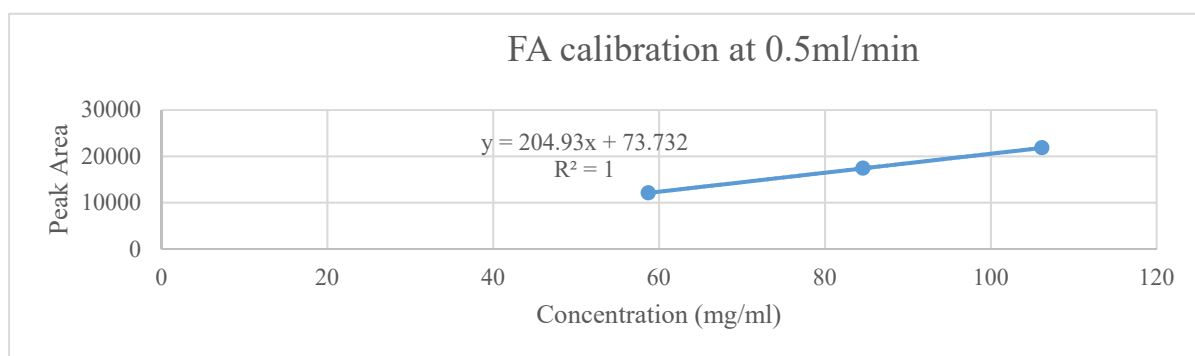

**Figure S1.** Formic acid (FA) standard calibration curve at mobile phase flow rate 0.5 ml/min.

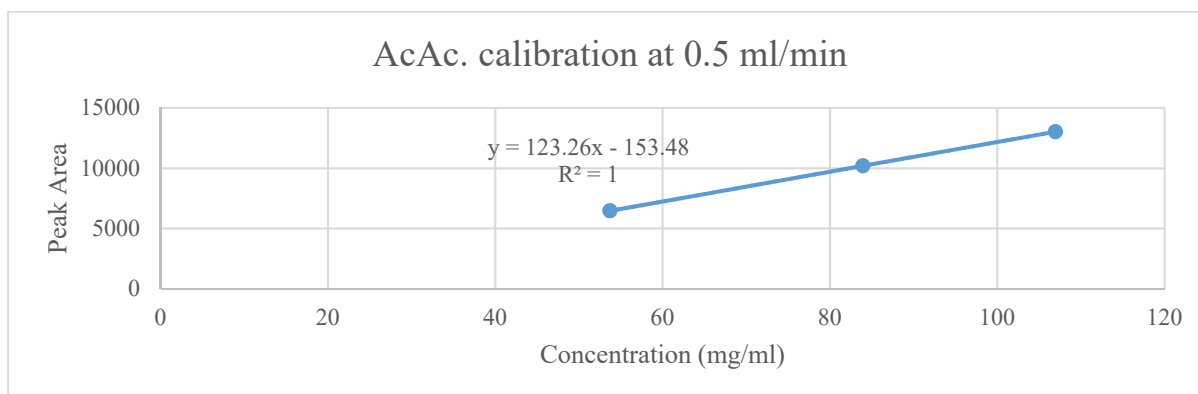

**Figure S2.** Acetic acid (AcAc) standard calibration curve at mobile phase flow rate 0.5 ml/min.

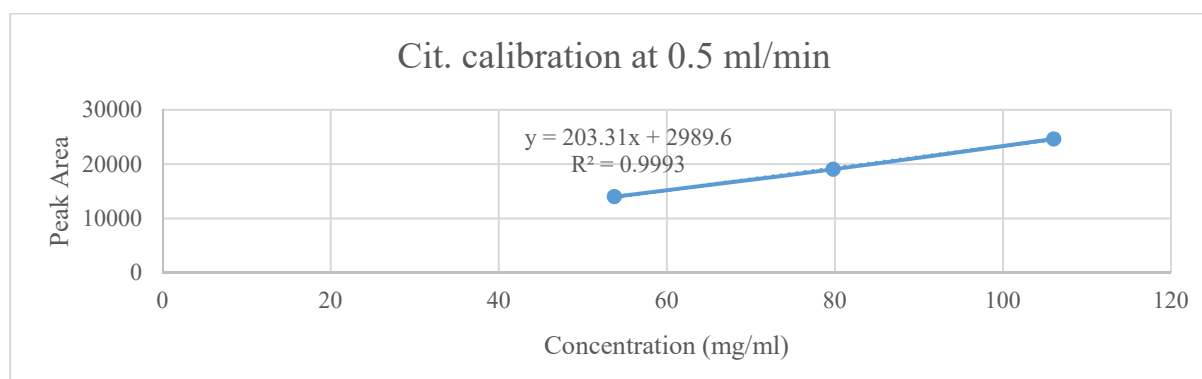

**Figure S3.** Citric acid (Cit) standard calibration curve at mobile phase flow rate 0.5 ml/min.

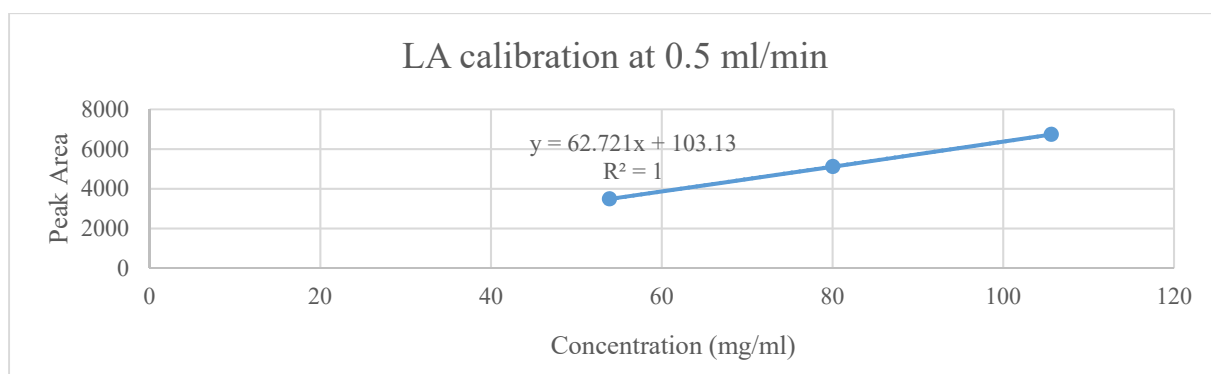

**Figure S4.** Levulinic acid (LA) standard calibration curve at mobile phase flow rate 0.5 ml/min.

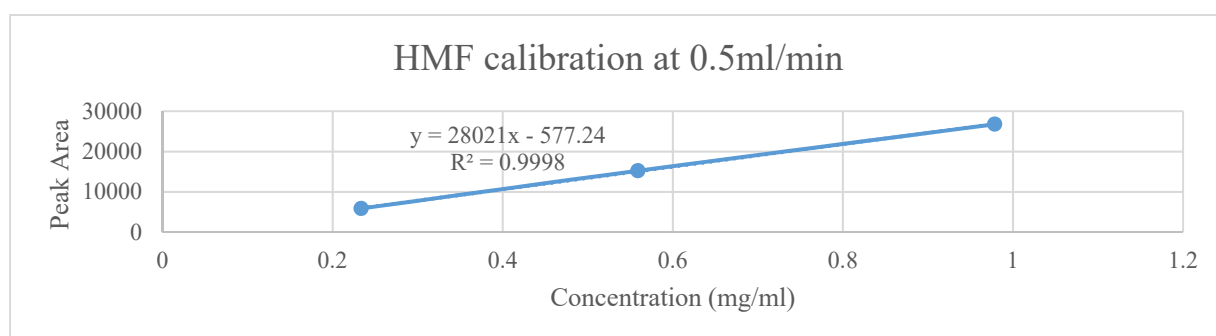

**Figure S5.** Hydroxymethylfurfural (HMF) standard calibration curve at mobile phase flow rate 0.5 ml/min.

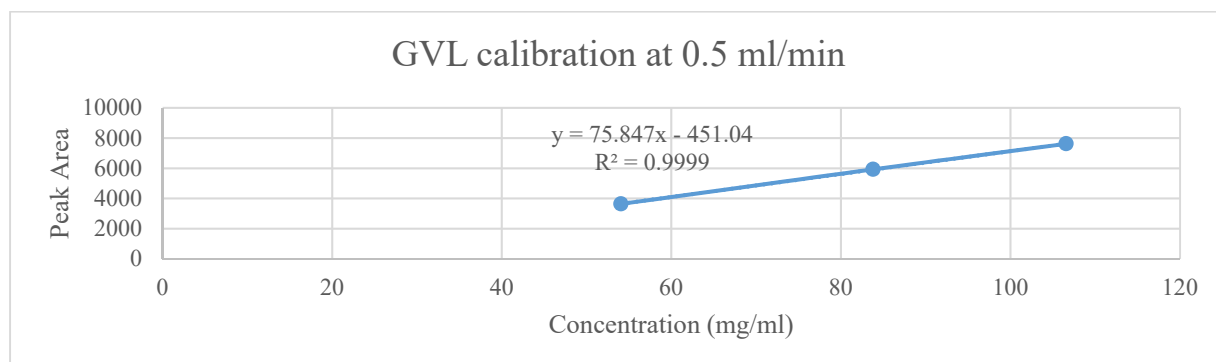

**Figure S6.** Gamma valerolactone (GVL) standard calibration curve at mobile phase flow rate 0.5 ml/min.

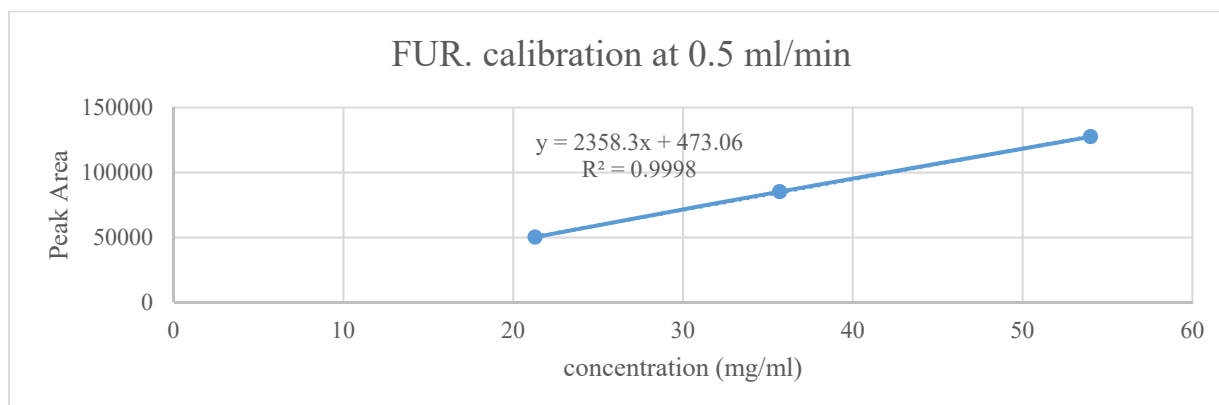

**Figure S7.** Furfural (FUR) standard calibration curve at mobile phase flow rate 0.5 ml/min.

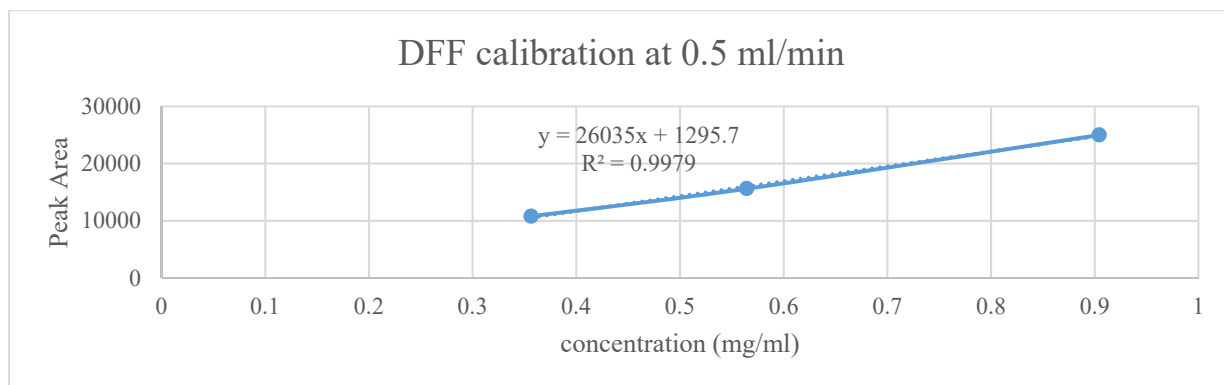

**Figure S8.** Diformylfuran (DFF) standard calibration curve at mobile phase flow rate 0.5ml/min.

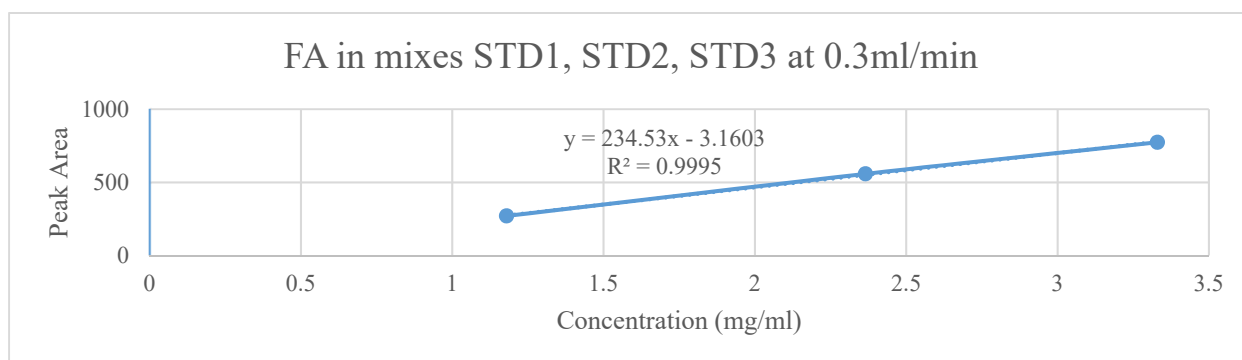

**Figure S9.** Formic acid (FA) in mix standard solutions STD1, STD2, & STD3 calibration curve at mobile phase flow rate 0.3 ml/min.

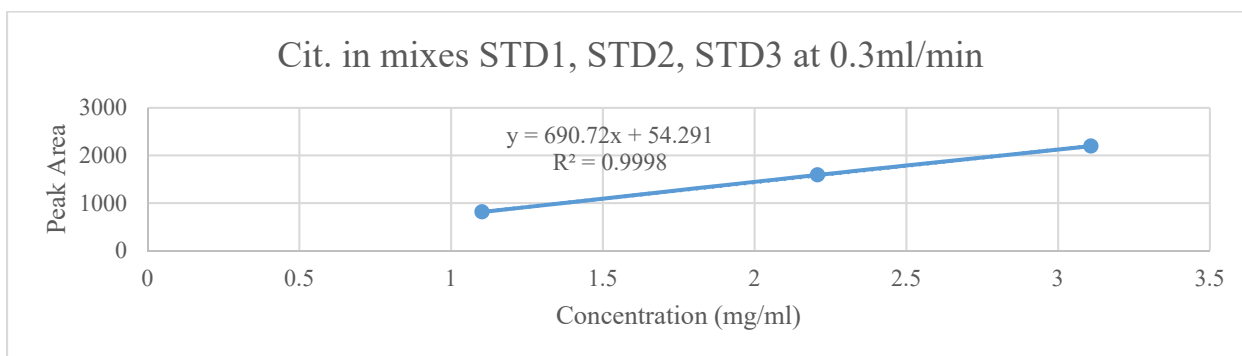

**Figure S10.** Citric (Cit) acid in mix standard solutions STD1, STD2, & STD3 calibration curve at mobile phase flow rate 0.3 ml/min.

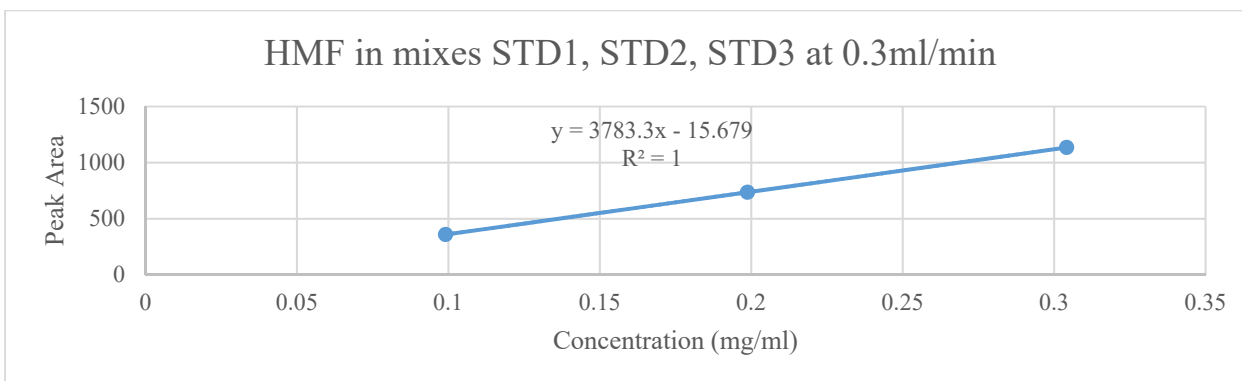

**Figure S11.** HMF in mix standard solutions STD1, STD2, & STD3 calibration curve at mobile phase flow rate 0.3 ml/min.

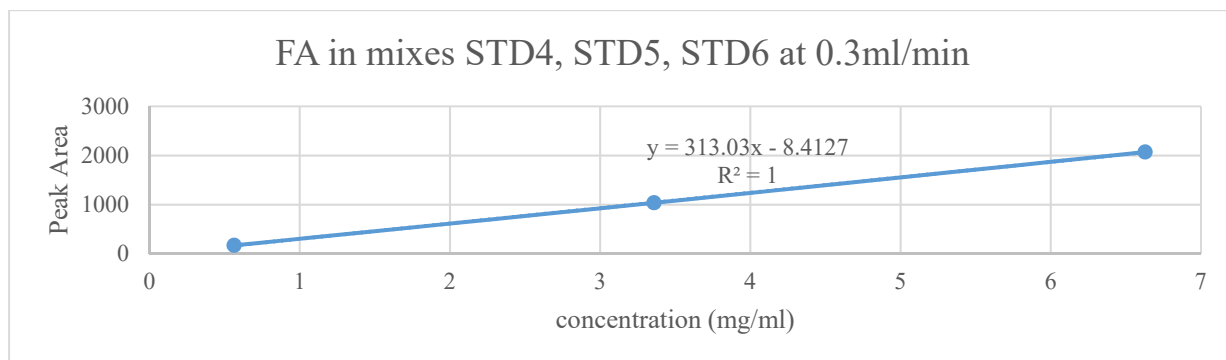

**Figure S12.** Formic acid (FA) in mix standard solutions STD4, STD5, & STD6 calibration curve at mobile phase flow rate 0.3 ml/min.

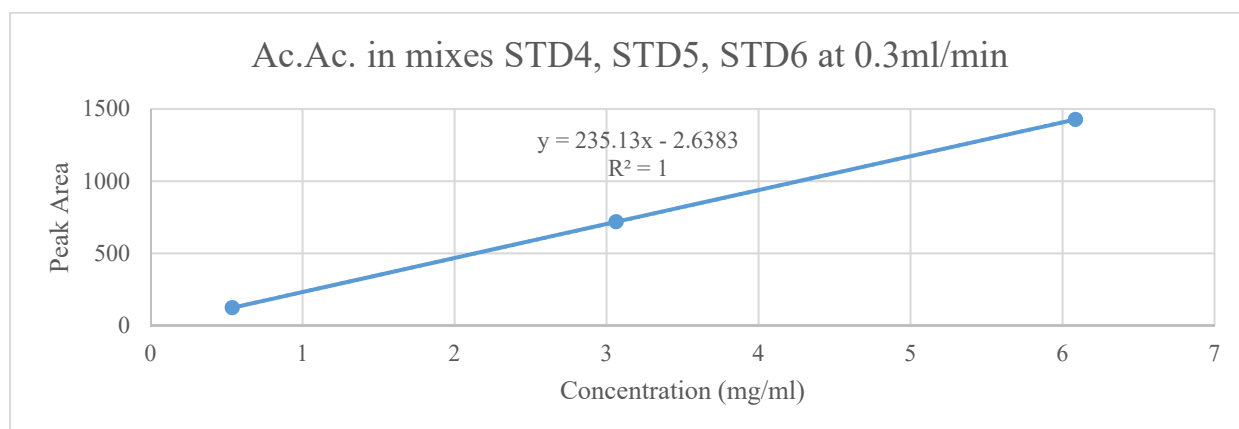

**Figure S13.** Acetic acid (Ac. Ac.) in mix standard solutions STD4, STD5, & STD6 calibration curve at mobile phase flow rate 0.3 ml/min.

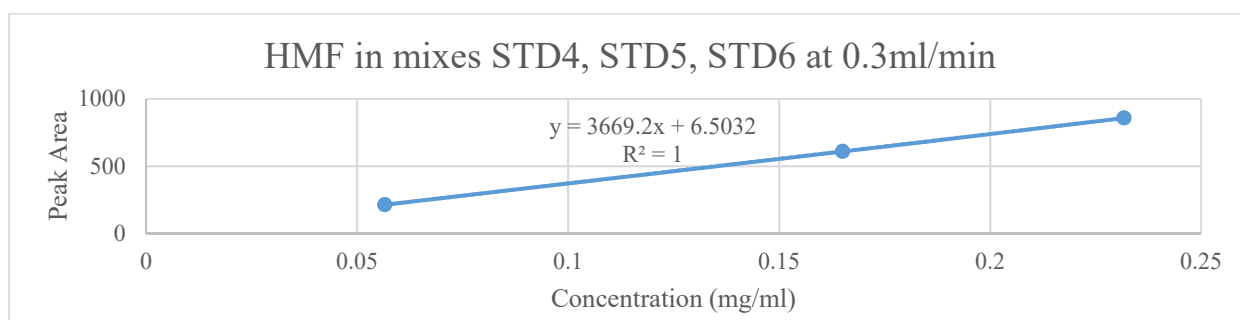

**Figure S14.** HMF in mix standard solutions STD4, STD5, & STD6 calibration curve at mobile phase flow rate 0.3 ml/min.

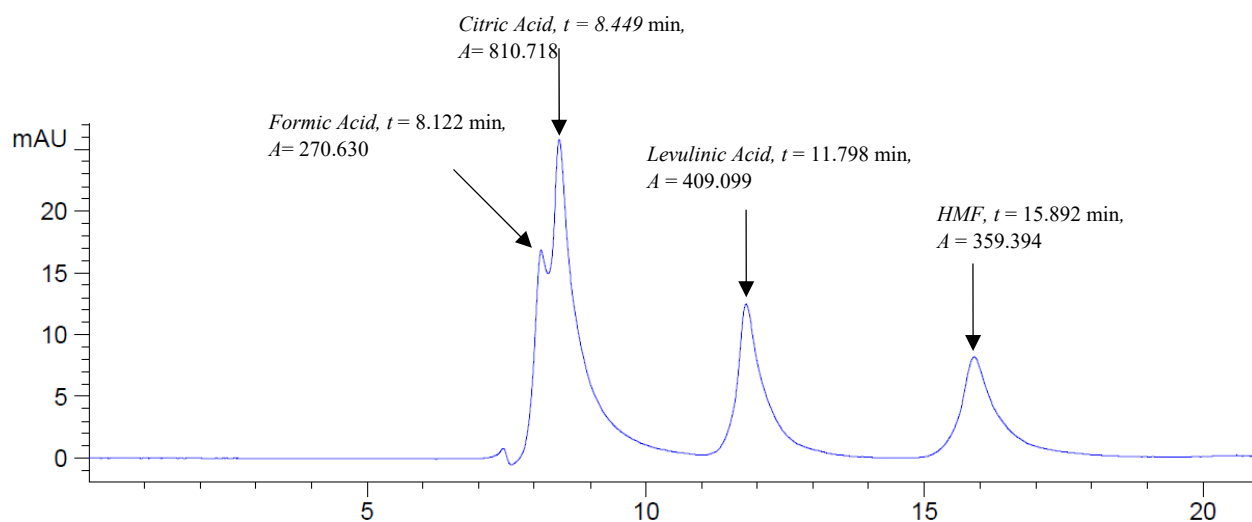

**Figure S15.** Mix standard solution STD1 chromatogram run at UV-210 nm at conditions: flow rate: 0.3ml/min., column temperature: 30°C, run time: 20 min.

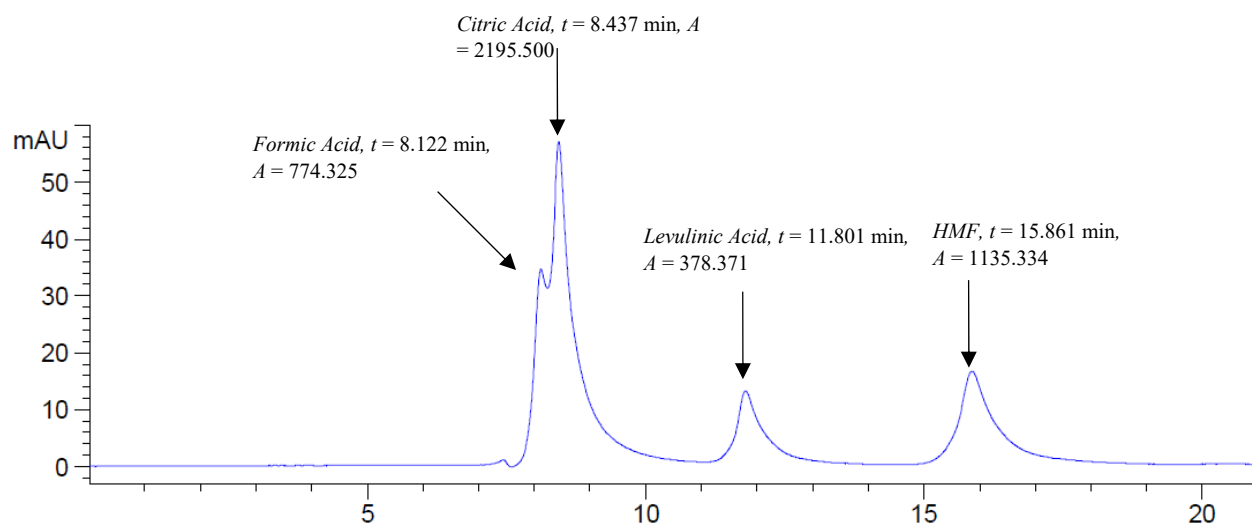

**Figure S16.** Mix standard solution STD3 chromatogram run at UV-210 nm at conditions: flow rate: 0.3ml/min., column temperature: 30°C, run time: 20 min.

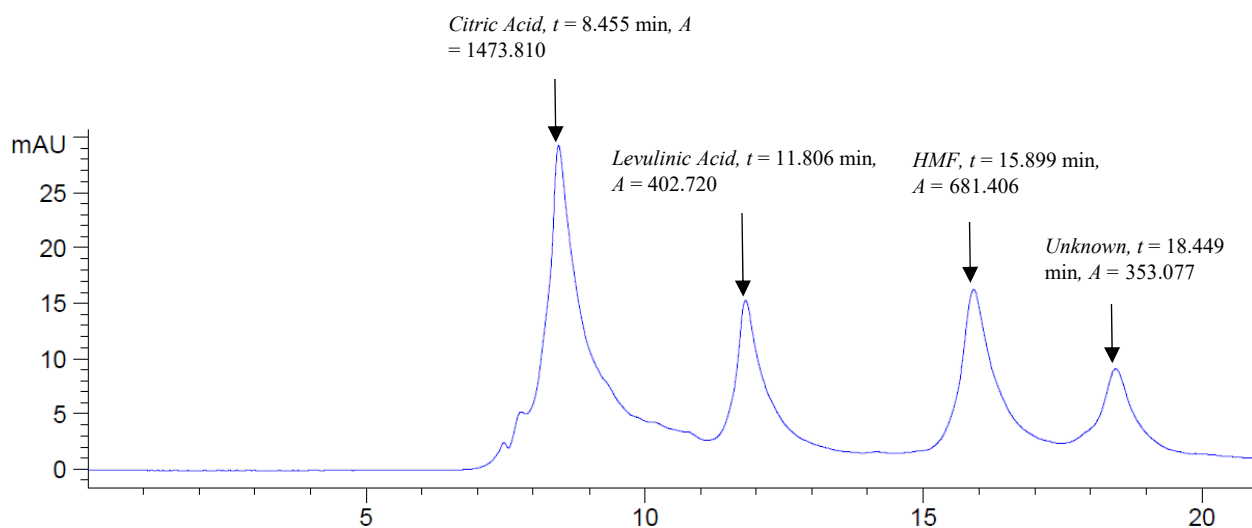

**Figure S17.** Pomegranate molasses (Pom.B) sample chromatogram run at UV-210 nm at conditions: flow rate: 0.3ml/min., column temperature: 30°C, run time: 20 min.

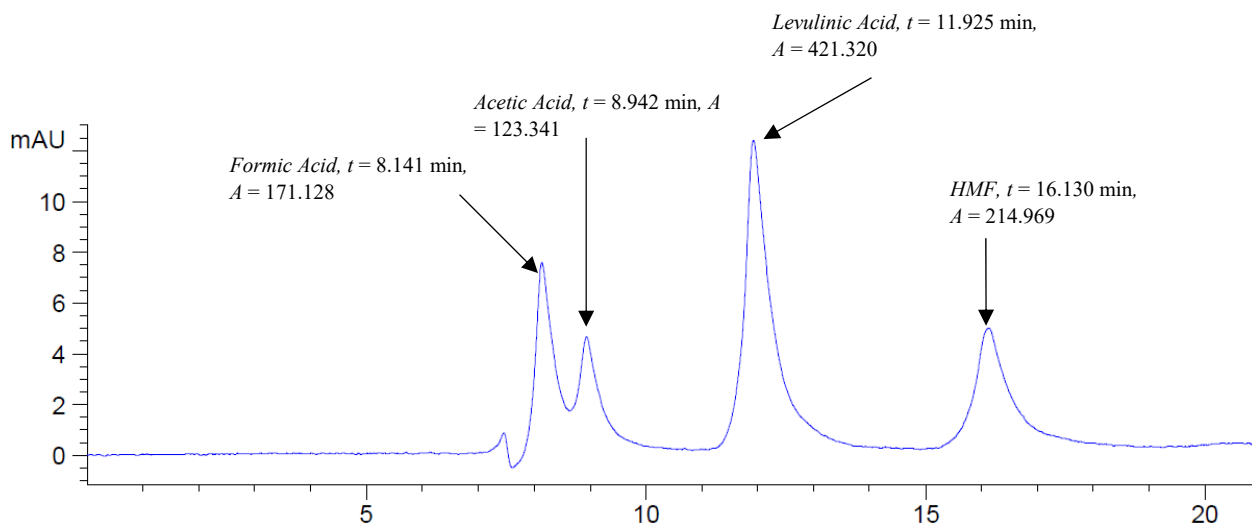

**Figure S18.** Standard mix solution STD4 chromatogram run at UV-210 nm at conditions: flow rate: 0.3ml/min., column temperature: 30°C, run time: 20 min.

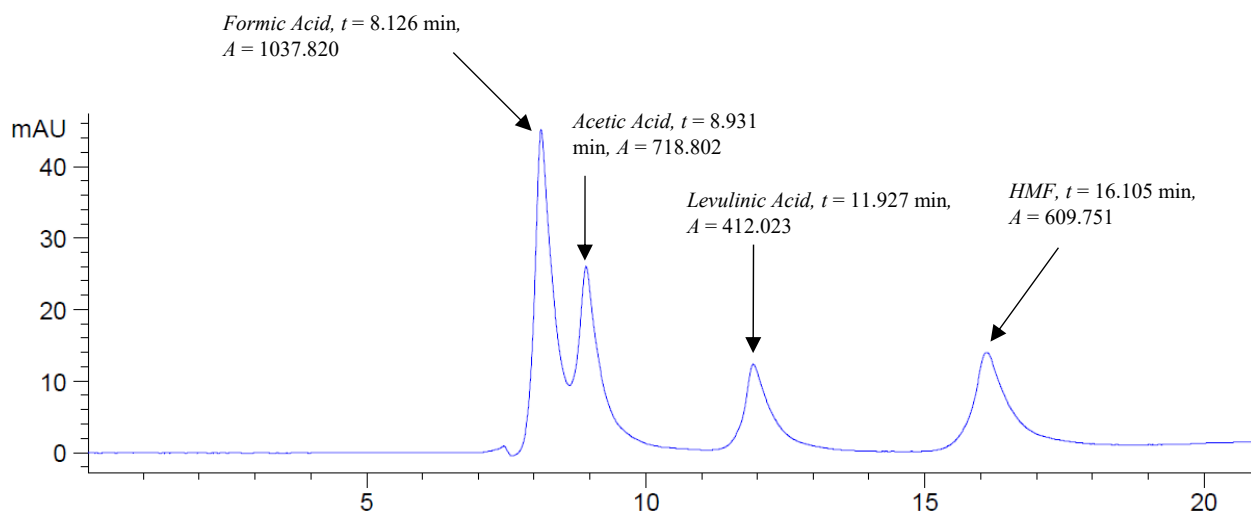

**Figure S19.** Standard mix solution STD5 chromatogram run at UV-210 nm at conditions: flow rate: 0.3ml/min., column temperature: 30°C, run time: 20 min.

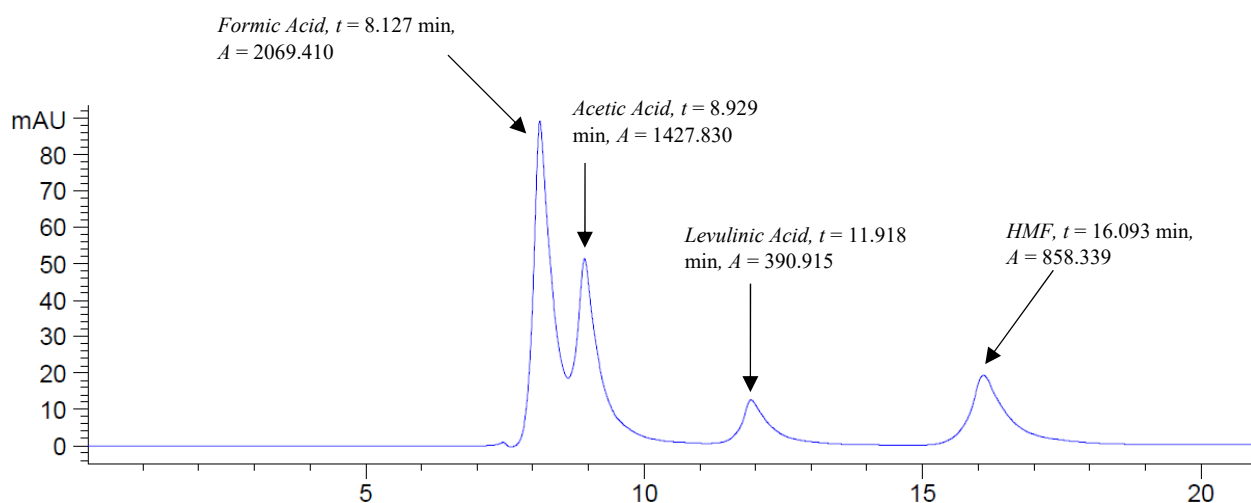

**Figure S20.** Standard mix solution STD6 chromatogram run at UV-210 nm at conditions: flow rate: 0.3ml/min., column temperature: 30°C, run time: 20 min.

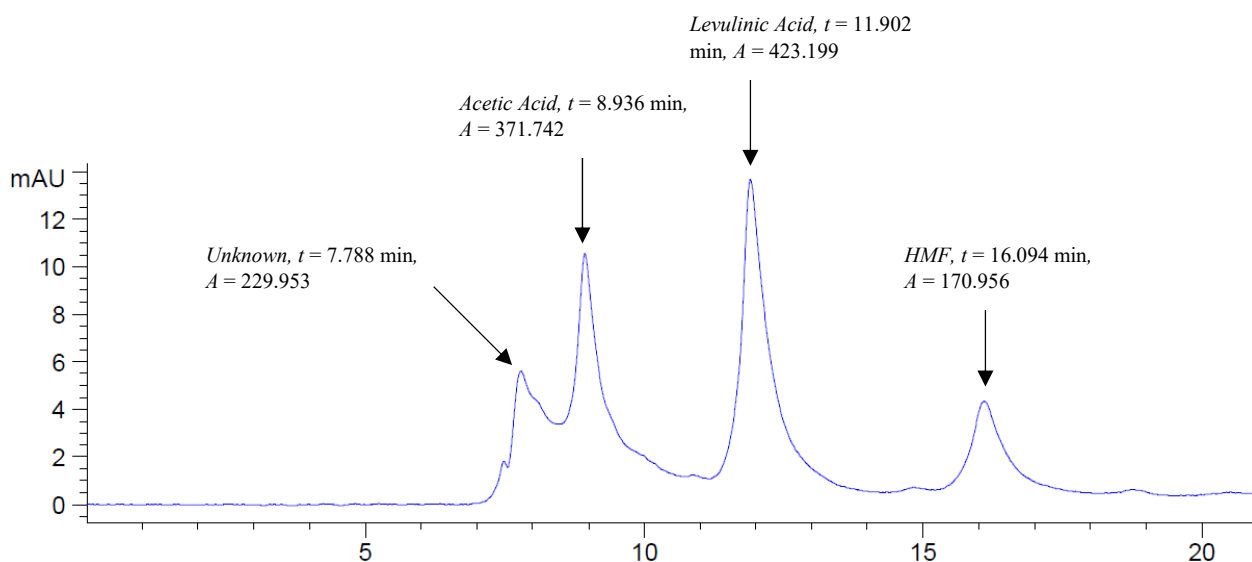

**Figure S21.** Balsamic vinegar B.VIN (B) chromatogram run at UV-210 nm at conditions: flow rate: 0.3ml/min., column temperature: 30°C, run time: 20 min.

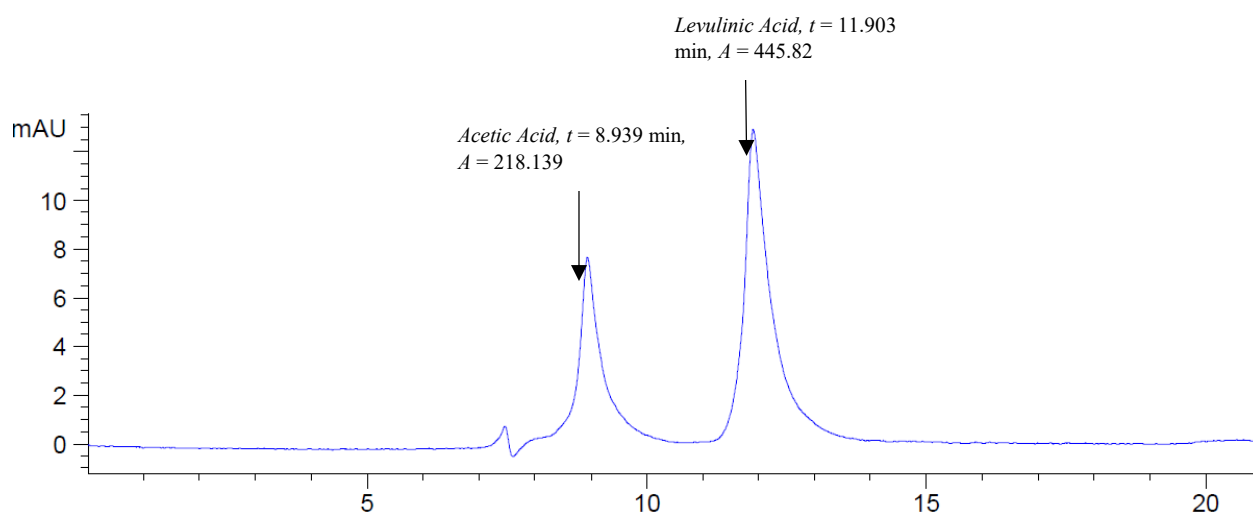

**Figure S22.** Apple cider vinegar ACV (B) chromatogram run at UV-210 nm at conditions: flow rate: 0.3ml/min., column temperature: 30°C, run time: 20 min.

### Sample Calculations:

In order to quantify the commercial products' ingredients, a certain amount of pomegranate molasses, apple cider vinegar, and balsamic vinegar was weighed before was transferred into a 15 ml tube and diluted to volume. The calculation procedure of the concentrations of each species is as follows:

The weighed amount of pomegranate was  $m_{\text{sample}} = m_{\text{POM}} = 0.3315 \text{ gr}$ .

The density of pomegranate a density of  $\rho_{\text{POM}} = 1.3803 \text{ gr/ml}$

Therefore, the volume of sample transferred into the 15 ml tube

$$V_{\text{POM}} = \frac{0.3315 \text{ gr}}{1.3803 \text{ gr/ml}} = 0.2402 \text{ ml}$$

The peak area of POM.A was 1441.2605, which was close to the area of STD2-inline-POM.A of a value of 1633.66931. The corresponding response factor RF= 739.931.

Thus, the concentration of citric acid in the vial  $C_{cit, vial}$  is calculated as follows:

$$C_{cit, vial} = \frac{Cit. Area}{Cit. RF} = \frac{1441.2605}{739.9309} = 1.948 \text{ mg/ml}$$

Afterwards, the concentration of citric acid in the original sample of pomegranate before dilution  $C_{cit, sample}$  was calculated using the below equation

$$C_{cit, sample} = \frac{C_{cit, vial} \times V_{total}}{V_{sample}} = \frac{(1.948 \text{ mg/ml}) \times (15 \text{ ml})}{0.2402 \text{ ml}} = 121.656 \text{ mg/ml}$$

The concentration of citric acid in POM.B is calculated in similar manner and its value was 125.1936 mg/ml. The standard deviation is calculated based on the values of the concentration of citric acid  $C_{cit, vial}$  &  $C_{cit, sample}$  of the samples duplicates.
